# Supplementary material for: FDA-Approved Drug Screening for Compounds That Facilitate Hematopoietic Stem and Progenitor Cells (HSPCs) Expansion in Zebrafish
Source: MDPI journal article supplement (doi:10.3390/cells10082149), 2021-08-20
Supplement: s1 [file s1]

## Supplementary Material

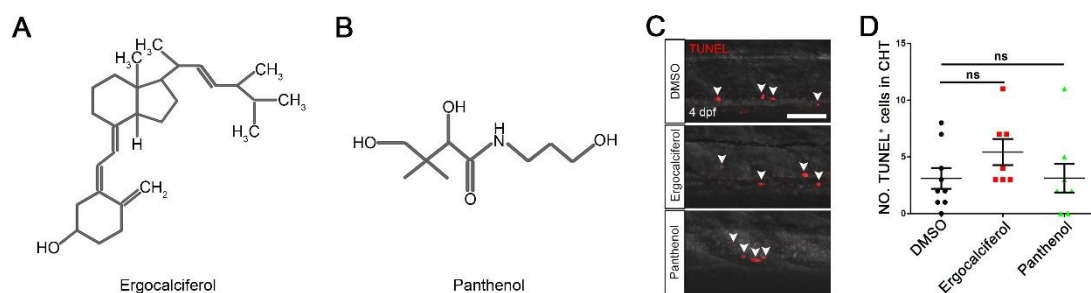

**Figure S1:** The structural formulas of ergocalciferol and panthenol and their effects on cell apoptosis. **(A-B)** The structural formula of ergocalciferol (A) and panthenol (B). **(C)** Confocal images of TUNEL assay after treating with either ergocalciferol or panthenol. White arrowheads indicate TUNEL<sup>+</sup> signals. **(D)** Statistical result of (C) (Mean ± SEM; DMSO, 3 ± 1, *n*=9; Ergocalciferol, 5 ± 1, *n*=7; Panthenol, 3 ± 1, *n*=8). Scale bar, 50 μm; ns, no significance.
